# Supplementary material for: Optimizing legume green manure applications for enhanced forage sorghum-sudangrass performance and soil property improvements
Source: PeerJ. 2025 Oct 3;13:e20137. doi: 10.7717/peerj.20137 (PMC12499566; doi:10.7717/peerj.20137)
Supplement: Supplemental Information 1 — Data for all examined variables and soil data. [file peerj-13-20137-s001.xlsx]

## Sheet: Rawdata
Year	Replication	Green Manure	FFY	HY	PH	LN	SPADa	SPADb	SPADc	SPADm	LAI	ADF	NDF	CPR	CPY	RFV	NDVI	GMYield
1	1	Cntrl	3254	780	184	2025-03-06	42.7	42.8	39.4	41.1	6.43	36	59.7	6.98	54.444	138.488	0.55	0
1	2	Cntrl	3547	798	182	2025-01-07	38.9	37.4	36.9	37.15	6.89	35	59.5	7.68	61.2864	138.953	0.52	0
1	3	Cntrl	3385	763	165	2025-08-06	37	37	37.8	37.4	6.98	34.2	58.6	7.88	60.1244	141.086	0.54	0
1	1	Fert	8874	1675	263	2025-04-12	52.8	54.5	53.1	53.8	8.28	38.2	57.3	9.69	162.308	144.291	0.92	0
1	2	Fert	8475	1610	264	2025-03-12	52.3	54.8	52.8	53.8	9.78	38.7	58.9	9.58	154.238	140.372	0.88	0
1	3	Fert	8496	1559	271	2025-06-12	51.7	55	51	53	8.45	39.9	59	9.87	153.873	140.135	0.9	0
1	1	Vetch1	7564	1388	264	11.8	48.2	56.8	56	56.4	9.98	34.7	56.7	11.12	154.346	145.814	0.79	3150
1	2	Vetch1	7658	1374	268	2025-09-11	50.4	57	55.9	56.45	10.01	34.6	56.2	11.57	158.972	147.112	0.82	3045
1	3	Vetch1	7648	1290	268	11.2	49.9	57.6	55.7	56.65	9.2	35	56.1	10.89	140.481	147.374	0.81	3028
1	1	Vetch2	8210	1589	268	11.5	47.3	52.7	51.8	52.25	7.22	39.3	58.2	9.74	154.769	142.061	0.77	3898
1	2	Vetch2	8025	1478	267	11.2	49.3	52.2	52.7	52.45	7.48	39.2	57.5	8.89	131.394	143.79	0.72	4023
1	3	Vetch2	8065	1550	264	11.5	49	51.1	51.7	51.4	7.98	39.5	57.4	9.78	151.59	144.041	0.7	4045
1	1	Vetch3	7160	1245	252	2025-08-10	47.5	50.9	52.5	51.7	8.25	37	58.7	9.8	122.01	140.849	0.7	4234
1	2	Vetch3	7285	1235	254	10.8	47.9	50.3	52.8	51.55	8.87	37.4	58.4	9.1	112.385	141.572	0.72	4156
1	3	Vetch3	7050	1289	247	10.9	49	52.2	52.7	52.45	8.85	37.1	58.4	9.2	118.588	141.572	0.72	4233
1	1	Narbon1	7535	1457	253	2025-02-11	52.1	58	53.2	55.6	8.23	34.3	54.3	11.8	171.926	152.259	0.89	3350
1	2	Narbon1	7630	1541	251	2025-04-11	51.2	59.3	54.4	56.85	8.45	35.8	54.6	10.2	157.182	151.424	0.8	3143
1	3	Narbon1	8055	1598	258	11.5	51.9	59	54.8	56.9	8.1	35.7	55.8	10.92	174.502	148.167	0.91	3156
1	1	Narbon2	7655	1374	252	11	51.6	56	53	54.5	8.25	36.4	55.7	10.2	140.148	148.434	0.88	4333
1	2	Narbon2	7743	1345	253	11.2	53	55.8	53.8	54.8	8.87	37.1	55.2	10.89	146.471	149.779	0.87	4324
1	3	Narbon2	7325	1354	252	11.5	53.5	55.3	55.8	55.55	8.56	35.5	55.1	10.78	145.961	150.049	0.82	4656
1	1	Narbon3	6040	1289	236	10.5	48.2	55.4	52.8	54.1	7.1	35.7	53.8	11.23	144.755	153.675	0.79	5033
1	2	Narbon3	5860	1158	232	10.8	50	55.3	53	54.15	7.15	34.3	54	11	127.38	153.105	0.74	4967
1	3	Narbon3	5881	1174	238	10.8	52.1	54.6	53.1	53.85	7.16	35.1	54.4	11.8	138.532	151.98	0.74	5145
1	1	Pea1	7955	1587	269	11.3	53.5	57.3	57	57.15	7.89	38	58.6	9.78	155.209	141.09	0.89	3056
1	2	Pae1	7755	1557	266	11.2	47.9	58.8	57.4	58.1	8.2	37.4	58.7	9.45	147.136	140.849	0.84	3178
1	3	Pea1	7210	1565	268	11.5	50.8	58.1	55.8	56.95	8.45	37.8	58.9	9.17	143.51	140.371	0.87	3250
1	1	Pea2	6915	1421	259	10.5	50.3	53.7	52.6	53.15	8.1	37.1	59.2	9.98	141.816	139.659	0.87	4050
1	2	Pea2	7079	1430	254	10.9	50.1	52.8	52.2	52.5	7.89	37.1	56.5	10.2	145.86	146.333	0.87	4085
1	3	Pea2	7060	1452	254	10.8	51.6	53.3	52	52.65	7.12	37.2	56.4	10.14	147.233	146.593	0.84	4190
1	1	Pea3	6928	1374	254	10.2	49.7	50.2	50.2	50.2	7.1	34	53.4	10.2	140.148	154.825	0.75	4323
1	2	Pea3	7022	1371	250	10.8	49.7	49.6	49.8	49.7	7.2	34.7	57	9.8	134.358	145.047	0.74	4380
1	3	Pea3	7210	1400	253	10.4	49.5	49.9	49	49.45	7.25	34.9	57.3	9.84	137.76	144.288	0.79	4400
2	1	Cntrl	3048	688	178	2025-02-07	40.8	40.6	37.3	38.95	6.57	38.2	58.4	7.2	49.536	141.573	0.42	0
2	2	Cntrl	3124	714	177	2025-09-06	39.6	37.4	37.3	37.35	6.78	39.3	60.4	6.98	49.8372	136.886	0.41	0
2	3	Cntrl	3089	702	172	2025-01-06	38.5	37.1	37.1	37.1	6.34	36.7	59.8	7.22	50.6844	138.257	0.42	0
2	1	Fert	8925	1724	271	2025-02-13	52.2	53.6	53.2	53.4	9.34	39.2	56.7	10.23	176.365	145.819	0.93	0
2	2	Fert	8641	1745	273	2025-03-13	52	53.6	53.1	53.35	9.56	39.3	57.6	9.64	168.218	143.54	0.91	0
2	3	Fert	8556	1774	270	2025-07-13	52.4	54.6	52.6	53.6	9.45	39.2	58.6	9.78	173.497	141.091	0.91	0
2	1	Vetch1	7740	1301	262	11.2	51	55.8	55.8	55.8	10.23	35.2	53.5	11.23	146.102	154.537	0.86	3234
2	2	Vetch1	7890	1327	267	2025-07-11	52.6	56.9	56	56.45	10.54	34.2	54.8	11.86	157.382	150.869	0.89	3200
2	3	Vetch1	7900	1367	261	11.4	53.7	57.2	56.1	56.65	10.1	33.8	56	11.03	150.78	147.636	0.79	3156
2	1	Vetch2	8210	1585	268	11.5	49	53.1	51.5	52.3	7.95	35	56.3	10.2	161.67	146.851	0.72	3987
2	2	Vetch2	8265	1598	262	11.8	49.7	53.4	52.3	52.85	8.23	36.9	57.4	9.43	150.691	144.038	0.78	3965
2	3	Vetch2	8445	1532	260	11.6	49.3	50.8	51.5	51.15	8.45	36.9	57.8	9.64	147.685	143.042	0.73	3998
2	1	Vetch3	7450	1300	257	2025-08-10	48.6	51.1	51.1	51.1	8.12	35.2	53.7	10.2	132.6	153.961	0.73	4333
2	2	Vetch3	7550	1257	251	10.9	48.2	50.8	50.9	50.85	8.18	36.5	53.5	10.78	135.505	154.538	0.73	4300
2	3	Vetch3	7650	1284	251	11.8	49.5	51.2	52.3	51.75	8.23	35.9	52.8	11.2	143.808	156.586	0.72	4320
2	1	Narbon1	7860	1425	254	2025-09-11	51.5	56.9	53	54.95	7.37	40.7	58.3	9.8	139.65	141.818	0.84	3245
2	2	Narbon1	7860	1420	255	2025-06-11	54	60.2	57.3	58.75	7.73	36	54.7	10.45	148.39	151.147	0.82	3450
2	3	Narbon1	8178	1525	255	11.5	54.6	60.1	55.3	57.7	7.76	39.4	60.3	9.32	142.13	137.113	0.84	3350
2	1	Narbon2	7290	1312	251	10.9	50.8	55.2	53.1	54.15	7.5	35.8	56.3	10.87	142.614	146.852	0.83	3975
2	2	Narbon2	7245	1288	252	11.2	53	55.3	54.2	54.75	7.45	36.1	56.2	10.23	131.762	147.113	0.88	3800
2	3	Narbon2	7350	1227	251	11.3	52.9	54.7	55.9	55.3	7.56	36.4	55.4	10.45	128.221	149.238	0.85	4150
2	1	Narbon3	6111	1217	245	10.7	50.1	55.8	53.4	54.6	7.02	36.2	56.4	10.45	127.176	146.592	0.81	4985
2	2	Narbon3	6278	1138	246	10.8	51.4	54.9	53.9	54.4	7.01	36.7	56.2	10.12	115.166	147.114	0.79	5150
2	3	Narbon3	6278	1210	238	10	51.3	54.2	53.6	53.9	6.98	36.1	56.9	10.74	129.954	145.303	0.77	5085
2	1	Pea1	7450	1542	264	11.4	54.8	56.8	57.3	57.05	8.12	40.3	57.1	9.17	141.401	144.798	0.88	2900
2	2	Pae1	7580	1530	259	11.5	57.9	59.1	57.9	58.5	8.37	40.6	57.3	9.59	146.727	144.293	0.87	2975
2	3	Pea1	7752	1457	255	11	52	57.3	56	56.65	8.87	39.7	59	9.21	134.19	140.135	0.88	3025
2	1	Pea2	7012	1445	261	11	51.6	54.2	52.4	53.3	8.45	39.4	59.8	9.45	136.552	138.26	0.82	3565
2	2	Pea2	7188	1436	262	11.1	52.1	53	51.9	52.45	8.47	39.5	58.3	9.23	132.543	141.817	0.83	3855
2	3	Pea2	7041	1512	260	11	51.7	53.7	52.9	53.3	8.23	39.9	58.3	9.17	138.65	141.817	0.85	3900
2	1	Pea3	7050	1327	247	10.9	48	51.3	50.1	50.7	8.94	38.7	60.3	8.86	117.572	137.113	0.79	4650
2	2	Pea3	7000	1348	245	11	48.6	50.3	50.3	50.3	8.87	39.2	61	8.45	113.906	135.54	0.78	4485
2	3	Pea3	6920	1399	244	11.3	48.2	50.1	48.7	49.4	8.95	39	61.8	8.67	121.293	133.785	0.75	4500

## Sheet: Soil
Year	Green Manure	SOM			Tot Nitrogen
		BGM	AGM	ASG	BGM	AGM	ASG
2023	Cntrl	1.4	1.4	1.3	0.75	0.7	0.6
2023	Fert	1.4	1.4	1.4	0.78	0.83	0.68
2023	Vetch1	1.4	1.7	1.6	0.75	0.9	0.85
2023	Vetch2	1.3	1.7	1.6	0.75	0.9	0.85
2023	Vetch3	1.4	1.8	1.8	0.78	0.88	0.85
2023	Narbon1	1.4	1.6	1.6	0.75	0.83	0.75
2023	Narbon2	1.4	1.6	1.6	0.75	0.9	0.88
2023	Narbon3	1.4	1.7	1.7	0.75	0.78	0.79
2023	Pea1	1.4	1.5	1.5	0.78	0.9	0.9
2023	Pea2	1.4	1.6	1.6	0.75	0.85	0.88
2023	Pea3	1.4	1.7	1.6	0.75	0.85	0.89
2024	Cntrl	1.3	1.3	1.3	0.6	0.55	0.45
2024	Fert	1.4	1.4	1.4	0.6	0.85	0.65
2024	Vetch1	1.6	1.7	1.7	0.7	0.75	0.75
2024	Vetch2	1.5	1.7	1.7	0.8	0.85	0.8
2024	Vetch3	1.6	1.9	1.9	0.7	0.88	0.82
2024	Narbon1	1.5	1.8	1.7	0.7	0.72	0.72
2024	Narbon2	1.6	1.8	1.8	0.8	0.82	0.8
2024	Narbon3	1.6	1.9	1.9	0.75	0.85	0.85
2024	Pea1	1.5	1.5	1.5	0.78	0.88	0.82
2024	Pea2	1.5	1.7	1.6	0.8	0.83	0.85
2024	Pea3	1.6	1.8	1.8	0.85	0.88	0.85
